# Supplementary material
Source: PubMed Central journal article supplement (PMC2736413)
Supplement: 0900742106_0900742106SI.pdf [file 0900742106_0900742106SI.pdf]

# Supporting Information

Riemer et al. 10.1073/pnas.0900742106

## SI Text

### Target Sequences for siRNA Directed Against ERFAD mRNA (5'–3').

- #1: TCG AGC TAG CTA CGA ATC CAA
  - #2: CAG GAC GAC AAT GAC AAC TTT
  - #3: CCC GCT GAT TCG AGC TAG CTA
  - #4: CAA GGC TAA CGC CGA GTT CAA
- Control: AAT TCT CCG AAC GTG TCA CGT

**AMS Modification.** The *in vivo* redox state of the PDI-family members TMX3 and Erp57 was determined using 4-acetamido-4-maleimidylstilbene-2,2-disulfonic acid (AMS) to alkylate free thiols (1, 2). The redox state *in vivo* was trapped by alkylation of free thiols with 20 mM *N*-ethylmaleimide (NEM), and the cells were lysed in 80 mM Tris·HCl containing 100 mM NaCl, 2 mM EDTA, and 2% (wt/vol) SDS. The lysate was denatured by boiling for 2 min. Tris[2-carboxyethyl]phosphine (TCEP) was added (10 mM) to break existing disulfide bonds, which were then alkylated by the addition of 25 mM AMS (Molecular Probes) for 1 h at room temperature. By this assay, proteins containing disulfide bonds will be modified with AMS which results in a slower migration on SDS/PAGE.

**mPEG-mal Modification of PDI and ERdj5.** The *in vivo* redox state of PDI was determined as described in ref. 2. Cells grown in six-well plates were overnight pulse labeled, subjected to *in situ* NEM-alkylation and lysed in buffer containing SDS and denatured for 60 min at 97 °C. Subsequently, NEM was added to a final concentration of 20 mM, and the mixture was incubated at room temperature for 1 h. Then, an immunoprecipitation with anti-PDI was performed and proteins were released from the beads by boiling in 50  $\mu$ L 80 mM Tris·HCl, pH 7.0, 2% SDS. Forty microliters of the resulting supernatant was transferred to a tube containing 2  $\mu$ L of 200 mM TCEP ( $\approx$ 10 mM final concentration) and incubated for 15 min at room temperature to reduce active-site disulfides. Thus, reduced cysteine residues were then alkylated for 1 h at room temperature in 15 mM mPEG-mal. Excess mPEG-mal was removed by methanol/chloroform protein precipitation. Using this procedure, *in vivo*-oxidized cysteine residues will be modified with mPEG-mal, which in turn will result in decreased gel mobility.

The *in vivo* redox state of ERdj5 was determined as follows: HEK293 cells were pulsed with [<sup>35</sup>S]methionine (Perkin–Elmer) for 16 h, washed with cold PBS, covered with 10% TCA, and incubated on ice for 15 min. The precipitated cell material was then scraped from the culture dish with a rubber policeman, pelleted at 20,000  $\times$  *g* at 4 °C for 15 min and the pellet covered with a solution containing 58 mM Tris·HCl, pH 7, 27% dimethyl sulfoxide, 7.3% glycerol, 1.5% SDS, 15 mM methoxy polyethylene glycol-maleimide 5000 (mPEG-mal, Laysan Bio) 0.2 mM phenylmethylsulfonyl fluoride, and 0.1% bromocresol purple. After neutralization of the supernatant by dropwise addition of 1 M Tris/Cl, pH 8, until the solution turned purple, the pellet was solubilized using a microsonicator equipped with a 0.5 mm sonotrode (Hielscher Ultrasound Technology) followed by incubation at room temperature for 1 h. Ten sample volumes of cold 30 mM Tris·HCl, pH 8.1, 100 mM NaCl, 5 mM EDTA, and 2% Triton X-100 were then added, and the lysate processed for anti-ERdj5 immunoprecipitation.

When performed in this manner, without the *in situ* NEM alkylation step and the TCEP incubation used in the case of PDI, but with direct TCA treatment, it is the *in vivo*-reduced cysteine residues that will become modified with mPEG-mal.

**Splicing of XBP1 mRNA.** The splicing of XBP1 mRNA was analyzed as described in ref. 3. Appearance of the spliced product indicates induction of the Ire1 pathway of the unfolded protein response (UPR).

**Mass Spectrometry.** SEL1L was identified from SDS/PAGE gel bands as follows: First, protein bands were excised and *in gel* digestion was performed as described in ref. 4. Then the peptide mixtures were analyzed on a linear ion trap mass spectrometer (LTO, Thermo) interfaced with an electrospray ion source. Chromatographic separation of peptides was achieved on an Agilent Series 1100 LC system (Agilent Technologies), equipped with an 11-cm fused silica emitter, 100- $\mu$ m inner diameter (BGB Analytik), packed in-house with a Magic C18 AQ 5  $\mu$ m resin (Michrom BioResources). Peptides were loaded from a cooled (4 °C) Agilent auto sampler and separated with a linear gradient of acetonitrile/water, containing 0.15% formic acid, with a flow rate of 0.95  $\mu$ L/min. Peptide mixtures were separated with a gradient from 5 to 30% acetonitrile in 90 min. For each peptide sample a standard data-dependent acquisition method on the three most intense ions per MS scan was used and a threshold of 10,000 ion counts was used for triggering an MS/MS attempt.

**Data Analysis.** The MS/MS data were searched against the human National Cancer Institute nonredundant database from 18.12.2004 using the Comet algorithm (5). For the *in silico* digest of the protein database trypsin was defined as protease, cleaving after K and R (if followed by P the cleavage was not allowed). Two missed cleavages and one nontryptic terminus were allowed for the peptides, which had a maximum mass of 6,000 Da. The precursor ion tolerance was set to 3 Da and fragment ion tolerance was set to 0.5 Da. Finally, search results obtained by the Comet algorithm were analyzed by the transproteomic pipeline (6, 7).

**Plasmids and Primers.** For plasmids and primers see Table S1.

**The Redox State of ERdj5.** The ERdj5 *in vivo* redox state has not previously been investigated. Interestingly, the vast majority of ERdj5 is oxidized at steady state (Fig. S4H). We also show that the ERdj5 redox state is seemingly not affected by the knock-down of ERFAD, although this was perhaps to be expected based on the detected interaction between the two proteins. However, because ERdj5 contains four thioredoxin-like domains with active-site CXXC motifs, the protein can—in addition to the completely oxidized and reduced states—exist in a variety of semioxidized forms where the redox state of the various domains differ. As observed for PDI, where the two semioxidized forms migrate differently despite both having one active site oxidized and the other reduced (2), these many redox forms likely run differently by SDS/PAGE. Although the reduced and oxidized forms clearly appear in the control lanes, we detected only very weakly one semioxidized form (Fig. S4H, lanes 3 and 4; arrowheads). Still, there might be even lower levels of other semioxidized forms present in the cell that we do not detect. This assay therefore does not provide sufficient information to state anything definite about a potential change in the redox state of ERdj5 upon down-regulation of ERFAD. At present we can only conclude that no change occurs to significantly lower the level of the fully oxidized state. This does not rule out that ERFAD could control the redox state of one particular active site (and not the remaining three). The inves-

igation of this possibility would require mutants with active-site cysteines changed to Ser or Ala in three of four thioredoxin-like

domains. These four mutants should then be tested as potential substrates for ERFAD.

1. Haugstetter J, Blicher T, Ellgaard L (2005) Identification and characterization of a novel thioredoxin-related transmembrane protein of the endoplasmic reticulum. *J Biol Chem* 280:8371–8380.
2. Appenzeller-Herzog C, Ellgaard L (2008) In vivo reduction-oxidation state of protein disulfide isomerase: The two active sites independently occur in the reduced and oxidized forms. *Antioxid Redox Signal* 10:55–64.
3. Yoshida H, Matsui T, Yamamoto A, Okada T, Mori K (2001) XBP1 mRNA is induced by ATF6 and spliced by IRE1 in response to ER stress to produce a highly active transcription factor. *Cell* 107:881–891.
4. Shevchenko A, Tomas H, Havlis J, Olsen JV, Mann M (2006) In-gel digestion for mass spectrometric characterization of proteins and proteomes. *Nat Protoc* 1:2856–2860.
5. Keller A, Eng J, Zhang N, Li XJ, Aebersold R (2005) A uniform proteomics MS/MS analysis platform utilizing open XML file formats. *Mol Syst Biol* 1:2005 0017.
6. Keller A, Nesvizhskii AI, Kolker E, Aebersold R (2002) Empirical statistical model to estimate the accuracy of peptide identifications made by MS/MS and database search. *Anal Chem* 74:5383–5392.
7. Nesvizhskii AI, Keller A, Kolker E, Aebersold R (2003) A statistical model for identifying proteins by tandem mass spectrometry. *Anal Chem* 75:4646–4658.
8. Mezghrani A, et al. (2001) Manipulation of oxidative protein folding and PDI redox state in mammalian cells. *EMBO J* 20:6288–6296.
9. Misaghi S, Pacold ME, Blom D, Ploegh HL, Korbel GA (2004) Using a small molecule inhibitor of peptide N-glycanase to probe its role in glycoprotein turnover. *Chem Biol* 11:1677–1687.
10. Baker BM, Tortorella D (2007) Dislocation of an endoplasmic reticulum membrane glycoprotein involves the formation of partially dislocated ubiquitinated polypeptides. *J Biol Chem* 282:26845–26856.





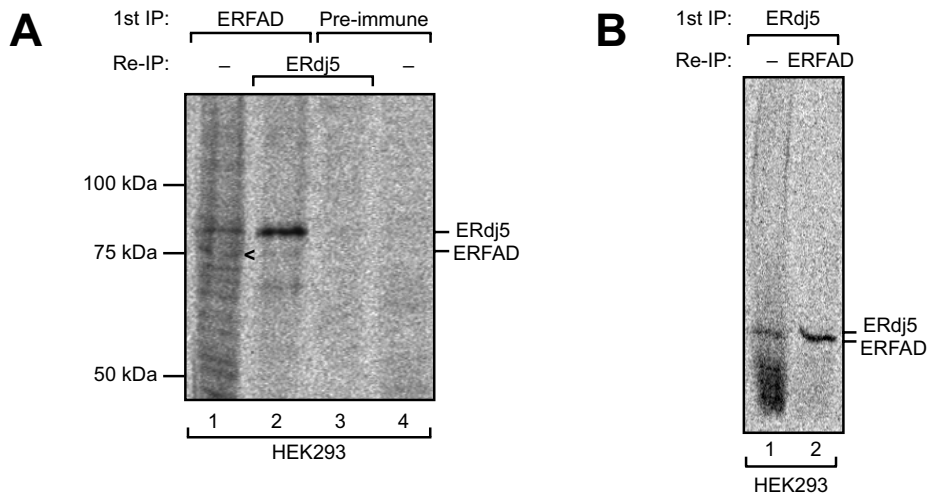

Fig. S3. Complete autoradiographs of the experiments shown in Fig. 2G.





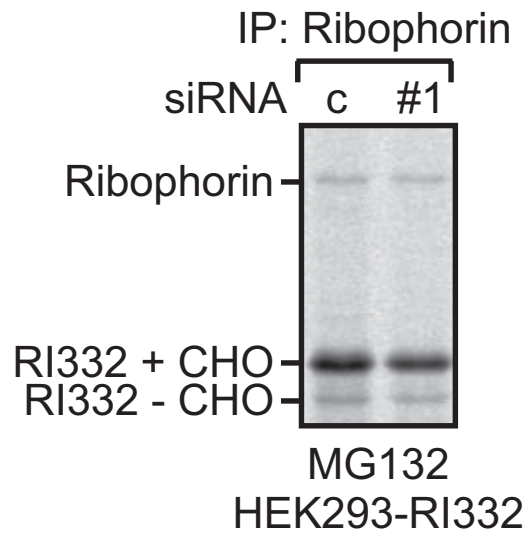

**Fig. S6.** After pulse labeling, approximately 95% of the newly synthesized RI332 exist in the glycosylated ER form. HEK293 cells stably expressing RI332 were transfected with either siRNA #1 directed against ERFAD or nonsilencing control siRNA (c). Seventy-two hours after transfection cells were pulse-labeled for 10 min in the presence of MG132 without a subsequent chase. SDS lysates were subjected to immunoprecipitation with anti-Ribophorin.
